# Supplementary material
Source: MDPI journal article supplement (https://www.mdpi.com/2304-6740/9/12/87)
Supplement: s1 [file s1]

Archive with 1 entries (1 files):
- inorganics-1469661-supplementary.pdf
