# Supplementary material
Source: MDPI journal article supplement (https://www.mdpi.com/2304-6740/9/12/87)
Supplement: s1 [file s1 › inorganics-1469661-supplementary.pdf]

# **PbS<sub>1-x</sub>Se<sub>x</sub>-Quantum-Dot@MWCNT/P3HT Nanocomposites with Tunable Photoelectric Conversion Performance**

He Zhu,<sup>1,2</sup> Huilin Hu,<sup>1</sup> Minheng Ye,<sup>1,2</sup> Jinhua Ye,<sup>1,2,3</sup> and Defa Wang<sup>1,2,\*</sup>

<sup>1</sup> *TJU–NIMS International Collaboration Laboratory, Key Laboratory of Advanced Ceramics and Machining Technology (Ministry of Education) and Tianjin Key Laboratory of Composite and Functional Materials, School of Materials Science and Engineering, Tianjin University, 92 Weijin Road, Tianjin 300072, China*

<sup>2</sup> *Collaborative Innovation Center of Chemical Science and Engineering, 92 Weijin Road, Tianjin 300072, China*

<sup>3</sup> *International Center for Materials Nanoarchitectonics (WPI-MANA) National Institute for Materials Science (NIMS), Namiki 1-1, Tsukuba, Ibaraki 305-0044, Japan*

---

\* Corresponding author. E-mail: [defawang@tju.edu.cn](mailto:defawang@tju.edu.cn)

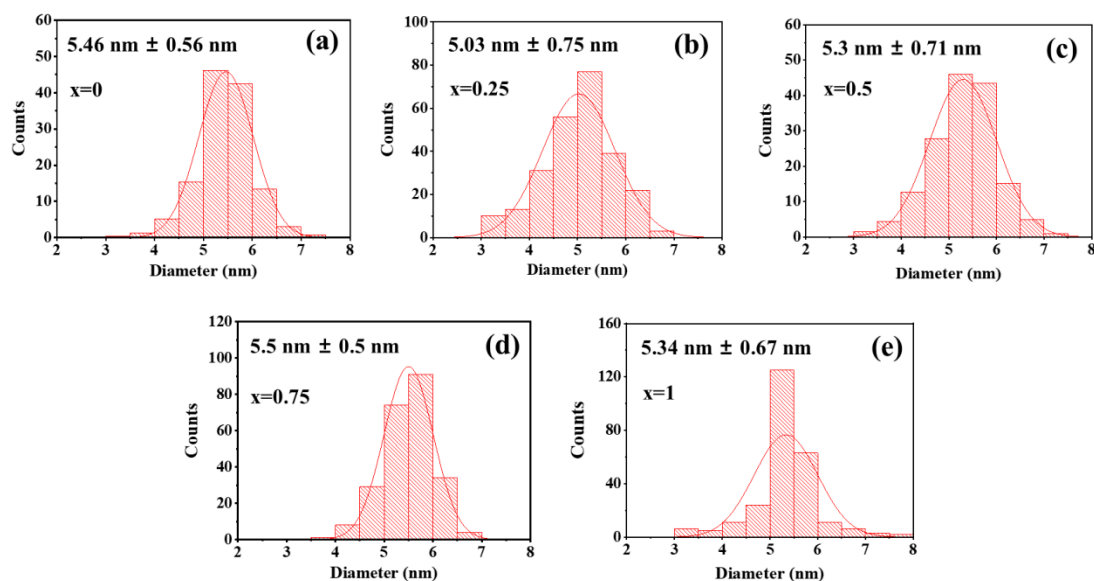

**Figure S1.** Histogram of size distribution of  $\text{PbS}_{1-x}\text{Se}_x$  ( $x = 0, 0.25, 0.5, 0.75, 1$ ) QDs.

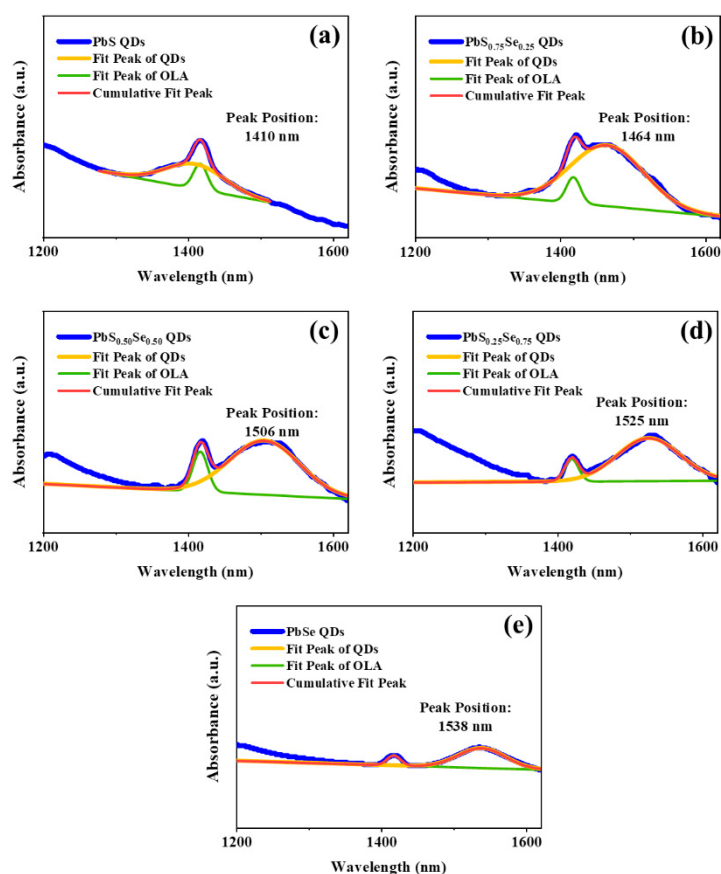

**Figure S2.** Fitted absorption spectra of  $\text{PbS}_{1-x}\text{Se}_x$  ( $x = 0, 0.25, 0.5, 0.75, 1$ ) QDs. The ligand OLA on the QDs surface could produce many tiny peaks in the absorption spectra, only the most conspicuous one at 1418 nm was taken into consideration for the Gaussian fitting to obtain the location of the first excitation peaks of the QDs.

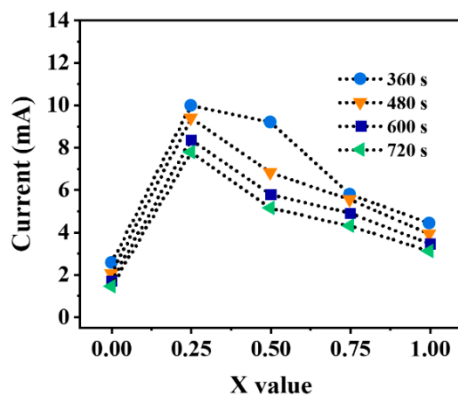

Figure S3. Photocurrents measured at different times as a function of  $x$  value in  $\text{PbS}_{1-x}\text{Se}_x\text{-QD@MWCNT/P3HT}$ .

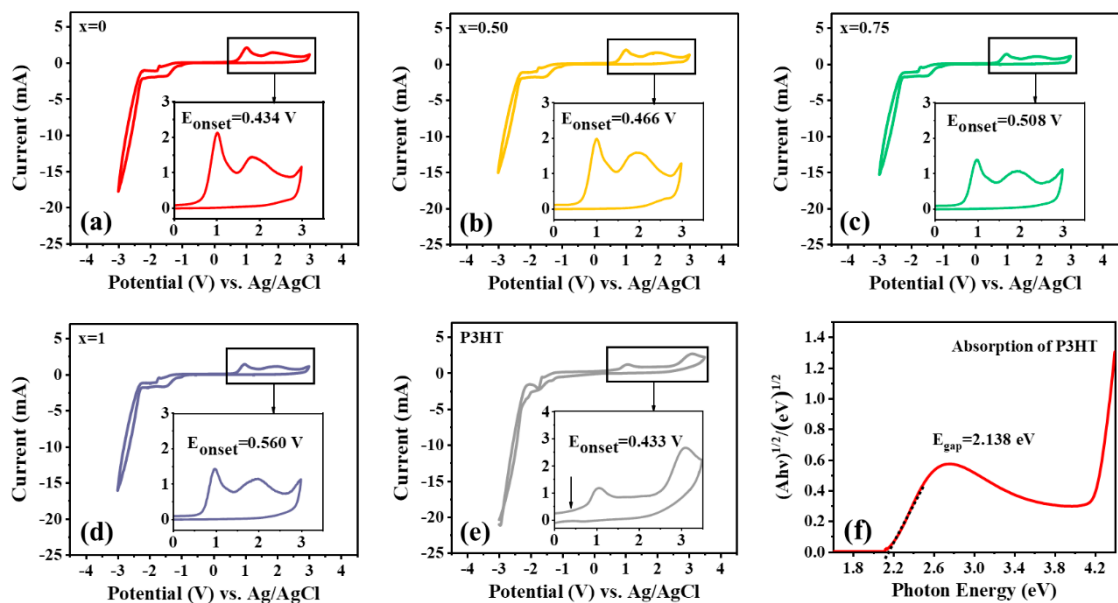

**Figure S4.** (a)-(e) Cyclic voltammetry (CV) curves of  $\text{PbS}$ ,  $\text{PbS}_{0.50}\text{Se}_{0.50}$ ,  $\text{PbS}_{0.25}\text{Se}_{0.75}$ ,  $\text{PbSe}$  QDs and  $\text{P3HT}$  measured in 3.5M  $\text{KCl}$  at room temperature.  $E_{\text{onset}}$  is the initial position of the oxidation peak, and  $E_{\text{HOMO}} = -(E_{\text{onset}} + \Delta E_{\text{Ag/AgCl}}) - 4.5$ , where  $\Delta E_{\text{Ag/AgCl}} = 0.204$  (V). (f) Absorption spectrum of  $\text{P3HT}$ .

**Table S1.** Energy level alignment of P3HT and PbS<sub>1-x</sub>Se<sub>x</sub> (x = 0, 0.25, 0.5, 0.75, 1) QDs

| Samples                                | E <sub>onset</sub> (V) | HOMO (eV) | E <sub>g</sub> (eV) | LUMO (eV) |
|----------------------------------------|------------------------|-----------|---------------------|-----------|
| P3HT                                   | 0.433                  | -5.137    | 2.138               | -2.999    |
| PbS                                    | 0.434                  | -5.138    | 0.879               | -4.259    |
| PbS <sub>0.75</sub> Se <sub>0.25</sub> | 0.444                  | -5.148    | 0.847               | -4.301    |
| PbS <sub>0.50</sub> Se <sub>0.50</sub> | 0.466                  | -5.17     | 0.823               | -4.347    |
| PbS <sub>0.25</sub> Se <sub>0.75</sub> | 0.508                  | -5.212    | 0.813               | -4.399    |
| PbSe                                   | 0.560                  | -5.264    | 0.806               | -4.458    |

\*E<sub>onset</sub> was obtained from CV tests; HOMO was calculated from  $E_{\text{HOMO}} = -(E_{\text{onset}} + \Delta E_{\text{Ag/AgCl}}) - 4.5$ . E<sub>g</sub> represented the band gap according to the absorption spectrum and the LUMO was obtained from HOMO and E<sub>g</sub>.

### Synthesis of PbS<sub>1-x</sub>Se<sub>x</sub> (x = 0, 0.25, 0.5, 0.75, 1) QDs [1–3]

20 mL of S-OLA, 20 mL of Se-OLA and 5 mL of PbCl<sub>2</sub>-OLA precursors were prepared in advance as described in the experimental section. Following the synthesis procedure of PbS<sub>0.75</sub>Se<sub>0.25</sub> QDs, the synthesis parameters for PbS, PbS<sub>0.50</sub>Se<sub>0.50</sub>, PbS<sub>0.25</sub>Se<sub>0.75</sub> and PbSe QDs are shown in Table S2.

**Table S2.** Synthesis parameters of PbS<sub>1-x</sub>Se<sub>x</sub> (x = 0, 0.25, 0.5, 0.75, 1) QDs.

| Sample                                 | Volume of PbCl <sub>2</sub> -OLA (mL) | Volume of S-OLA (mL) | Volume of Se-OLA (mL) | Temperature of PbCl <sub>2</sub> -OLA (°C) | Temperature of (S+Se)-OLA (°C) | Time (s) |
|----------------------------------------|---------------------------------------|----------------------|-----------------------|--------------------------------------------|--------------------------------|----------|
| PbS                                    | 5                                     | 1.7                  | 0                     | 90                                         | 90                             | 300      |
| PbS <sub>0.75</sub> Se <sub>0.25</sub> | 5                                     | 3.8                  | 1.2                   | 95                                         | 150                            | 40       |
| PbS <sub>0.50</sub> Se <sub>0.50</sub> | 5                                     | 2.5                  | 2.5                   | 100                                        | 150                            | 60       |
| PbS <sub>0.25</sub> Se <sub>0.75</sub> | 5                                     | 1.2                  | 3.8                   | 105                                        | 150                            | 100      |
| PbSe                                   | 5                                     | 0                    | 1.7                   | 120                                        | 240                            | 300      |

**Table S3.** Atomic ratio of S/Se in PbS<sub>1-x</sub>Se<sub>x</sub> (x = 0.25, 0.5, 0.75) QDs measured by XPS

| Samples                                | Atomic ratio of S/Se |
|----------------------------------------|----------------------|
| PbS <sub>0.75</sub> Se <sub>0.25</sub> | 3.13                 |
| PbS <sub>0.5</sub> Se <sub>0.5</sub>   | 1.08                 |
| PbS <sub>0.25</sub> Se <sub>0.75</sub> | 0.34                 |

## References

1. Cademartiri, L.; Bertolotti, J.; Sapienza, R.; Wiersma, D. S.; Von Freymann, G.; Ozin, G. A., Multigram Scale, Solventless, and Diffusion-Controlled Route to Highly Monodisperse PbS Nanocrystals. *J. Phys. Chem. B* **2006**, *110* (2), 671–673.
2. Akhtar, J.; Azad Malik, M.; O'Brien, P.; Wijayantha, K. G. U.; Dharmadasa, R.; Hardman, S. J. O.; Graham, D. M.; Spencer, B. F.; Stubbs, S. K.; Flavell, W. R.; Binks, D. J.; Sirotti, D.; Kazzi, M. E.; Silly, M., A greener route to photoelectrochemically active PbS nanoparticles. *J. Mater. Chem.* **2010**, *20* (12), 2336–2344.
3. Akhtar, J.; Afzaal, M.; Banski, M.; Podhorodecki, A.; Syperek, M.; Misiewicz, J.; Bangert, U.; Hardman, S. J. O.; Graham, D. M.; Flavell, W. R.; Binks, D. J.; Gardonio, S.; O'Brien, P., Controlled Synthesis of Tuned Bandgap Nanodimensional Alloys of  $\text{PbS}_x\text{Se}_{1-x}$ . *J. Am. Chem. Soc.* **2011**, *133* (14), 5602–5609.
